# Supplementary material for: To Ki or Not to Ki: Re-Evaluating the Use and Potentials of Ki-67 for T Cell Analysis
Source: PubMed Central journal article supplement (PMC8062736; doi:10.3389/fimmu.2021.653974), 2021-04-09
Supplement: Table_1.pdf [file Table_1.pdf]

## Supplemental Table 1. T<sub>DS</sub> assay for immuno-monitoring

### A) Vaccinated mice

|        | gag-specific CD8 (1 epitope)<br>vaccinated mice |                                                | total CD8<br>untreated mice |                                                |
|--------|-------------------------------------------------|------------------------------------------------|-----------------------------|------------------------------------------------|
|        | % in G <sub>1</sub>                             | % in S-G <sub>2</sub> /M<br>(T <sub>DS</sub> ) | % in G <sub>1</sub>         | % in S-G <sub>2</sub> /M<br>(T <sub>DS</sub> ) |
| day 3  | 22.36                                           | 4.98<br>(** vs day 44)                         | 3.82                        | 0.18                                           |
| day 7  | 76.28<br>(** vs day 44)                         | 0.61                                           | 5.05                        | 0.20                                           |
| day 44 | 1.56                                            | 0.02                                           | 6.67                        | 0.17                                           |

### B) T1D patients

|                                                                               | islet-specific CD8 (5 epitopes) |                                                                 | total CD8           |                                                |
|-------------------------------------------------------------------------------|---------------------------------|-----------------------------------------------------------------|---------------------|------------------------------------------------|
|                                                                               | % in G <sub>1</sub>             | % in S-G <sub>2</sub> /M<br>(T <sub>DS</sub> )                  | % in G <sub>1</sub> | % in S-G <sub>2</sub> /M<br>(T <sub>DS</sub> ) |
| T1D patients, T <sub>DS</sub> positive<br>(T1D T <sub>DS</sub> <sup>+</sup> ) | 15.25                           | 1.79<br>(** vs HD;<br>*** vs T1D T <sub>DS</sub> <sup>-</sup> ) | 2.14                | 0.11                                           |
| T1D patients, T <sub>DS</sub> negative<br>(T1D T <sub>DS</sub> <sup>-</sup> ) | 2.09                            | 0.00                                                            | 1.04                | 0.02                                           |
| Healthy donors (HD)                                                           | 2.63                            | 0.05                                                            | 1.41                | 0.04                                           |

### C) COVID-19 patients

|                               | CD4 T <sub>EM</sub>                  |                                                | CD8 T <sub>EM</sub>   |                                                | γδ T cells                          |                                                |
|-------------------------------|--------------------------------------|------------------------------------------------|-----------------------|------------------------------------------------|-------------------------------------|------------------------------------------------|
|                               | % in G <sub>1</sub>                  | % in S-G <sub>2</sub> /M<br>(T <sub>DS</sub> ) | % in G <sub>1</sub>   | % in S-G <sub>2</sub> /M<br>(T <sub>DS</sub> ) | % in G <sub>1</sub>                 | % in S-G <sub>2</sub> /M<br>(T <sub>DS</sub> ) |
| Severe<br>COVID-19            | 12.89<br>(**** vs HD)<br>(** vs Mod) | 1.25<br>(**** vs HD)<br>(**** vs Mod)          | 20.78<br>(**** vs HD) | 1.43<br>(**** vs HD)<br>(* vs Mod)             | 9.87<br>(**** vs HD)<br>(** vs Mod) | 0.33                                           |
| Moderate<br>COVID-19<br>(Mod) | 8.08<br>(*** vs HD)                  | 0.50<br>(** vs HD)                             | 12.88<br>(**** vs HD) | 1.02<br>(* vs HD)                              | 7.49<br>(** vs HD)                  | 0.18<br>(* vs HD)                              |
| Healthy<br>Donors<br>(HD)     | 3.45                                 | 0.12                                           | 2.27                  | 0.04                                           | 1.67                                | 0.02                                           |

Dual Ki-67/DNA staining was combined with peripheral blood T cell multi-color flow cytometric analysis, for a refined immuno-monitoring evaluation including cell cycle. **(A)** BALB/c mice were vaccinated by prime with the viral vector ChAd3 carrying the model antigen HIV-1 gag (gag), and boost with Modified Vaccine Ankara carrying gag, both administered intramuscularly in the quadriceps. Analysis of gag<sub>197-205</sub>-specific and total CD8 T cells was performed at the indicated times after boost in vaccinated and untreated mice, respectively (15). **(B)** Peripheral Blood Mononuclear Cells (PBMCs) from Type 1 Diabetes (T1D) patients, all within 1 year from diagnosis, and healthy donors (HD) were analyzed, using a pool of the following tetramers to identify islet-specific CD8 T cells: PPI<sub>15-24</sub>, InsB<sub>10-18</sub>, GAD<sub>114-123</sub>, IGRP<sub>265-273</sub>, and IA-2<sub>797-805</sub> HLA-A\*02 tetramers. T<sub>DS</sub><sup>+</sup> and T<sub>DS</sub><sup>-</sup> T1D patients were defined as those having > and < 0.248% T<sub>DS</sub> (i.e. HD mean + 3xSD) among islet-specific CD8 T cells, respectively (16). **(C)** PBMCs were obtained from HD and hospitalized COVID-19 patients, classified according to a World Health Organization's (WHO) eight-point scale as moderate (scores 3-4) and severe (scores 5-8). Patient classification reflected peak severity. CD4 T<sub>EM</sub>, CD8 T<sub>EM</sub>, and γδ T cells were analyzed (17). Numbers represent mean percentages of cells in G<sub>1</sub>, and in S-G<sub>2</sub>/M (T<sub>DS</sub>) from a total of 45 mice in (A), and of 21 and 104 donors in (B) and (C), respectively. Statistical analysis was performed by Kruskal-Wallis with Dunn's multiple comparison test (A and B) (15, 16), and by a linear mixed model grouped by severity, with patient as random variable, corrected for age- and sex-dependency (C) (17). Differences were considered statistically significant when \* P=.05, \*\* P=.01, \*\*\* P=.001, \*\*\*\* P=.0001, \*\*\*\*\* P=.00001. See original references for more details (15-17).
